# Supplementary material for: Personalizing image enhancement for critical visual tasks: improved legibility of papyri using color processing and visual illusions
Source: Springer Nature journal article supplement (doi:10.1007/s10032-021-00386-0), 2021-12-27
Supplement: MOESM1 [file 19976484]

## Supplementary Material

Presented herein are the ninety images used in the evaluation of papyri legibility enhancement experiment. The methods are described in the article, Sections 4 Methods and 5.1 Algorithms.

TSVP →

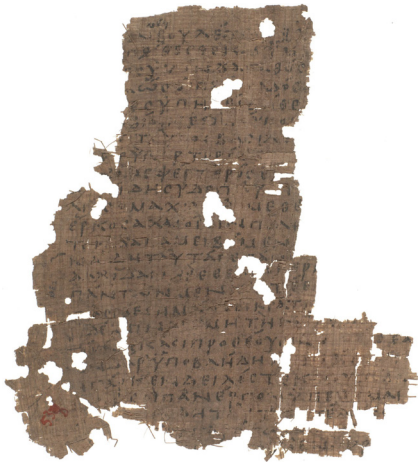

original

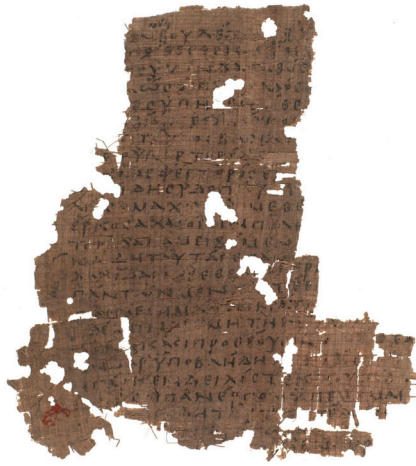

stretchlim

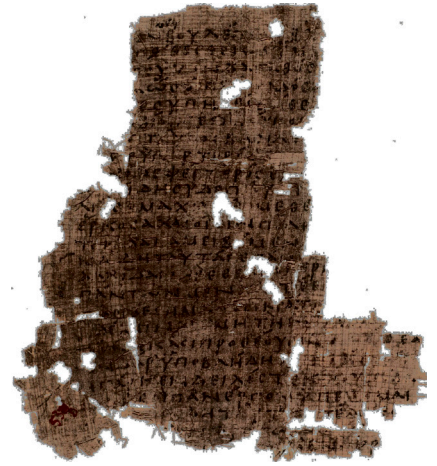

histeq

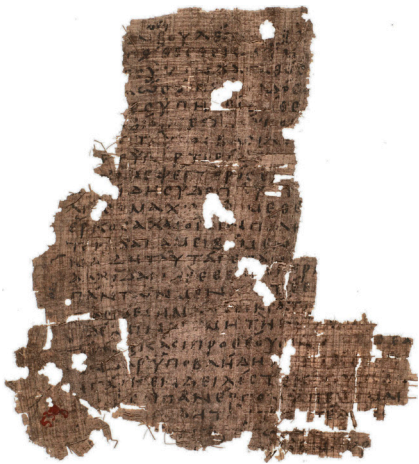

adapthisteq

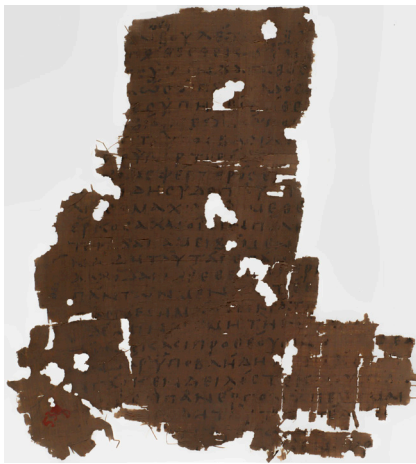

locallapfilt

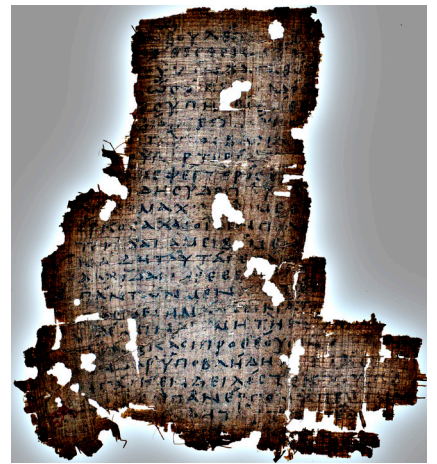

retinex

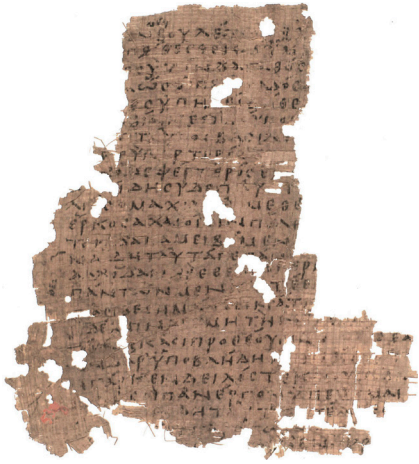

lsv

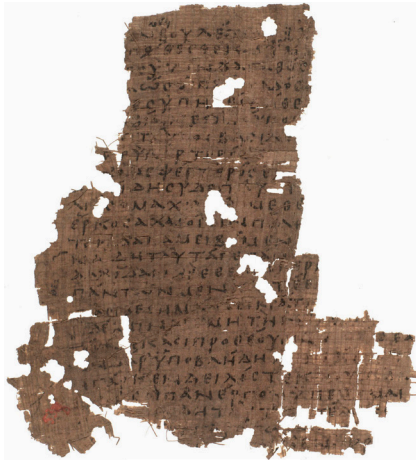

vividness

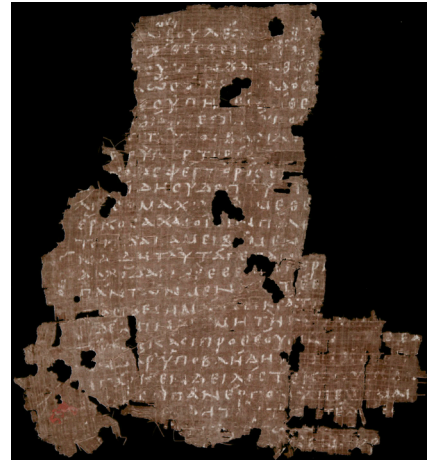

neglsv

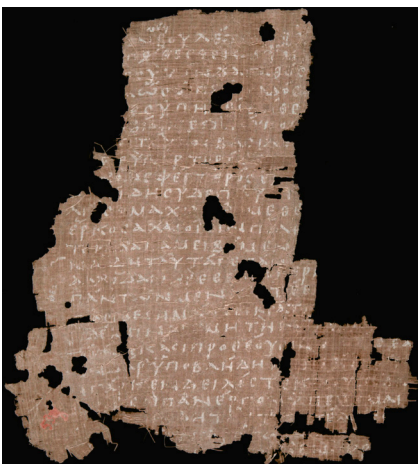

negvividness

SM  
—  
2

**columbia.apis.p367.f.0.600**

Credit of original papyrus reproduction:  
Columbia University Library, CC BY-  
NC 3.0

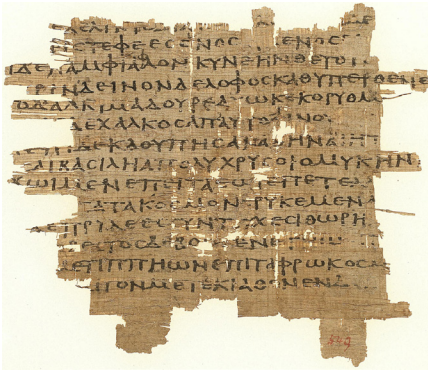

original

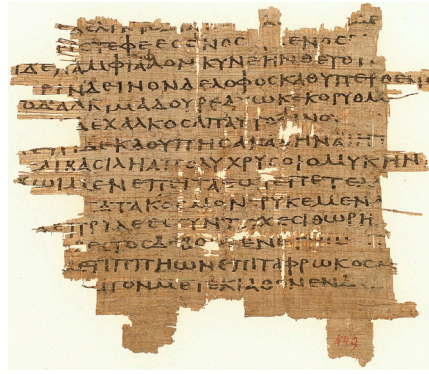

stretchlim

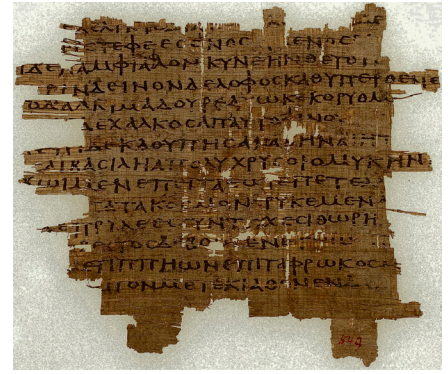

histeq

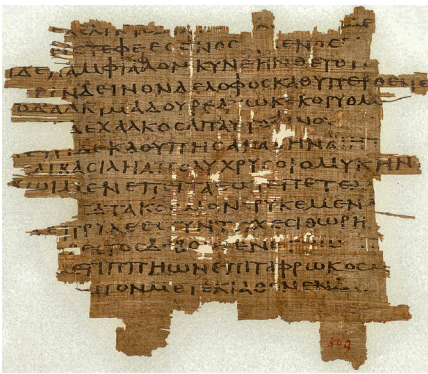

adapthisteq

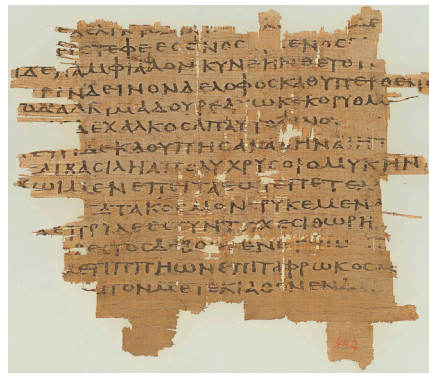

locallapfilt

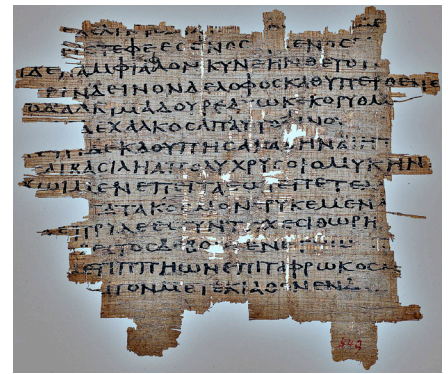

retinex

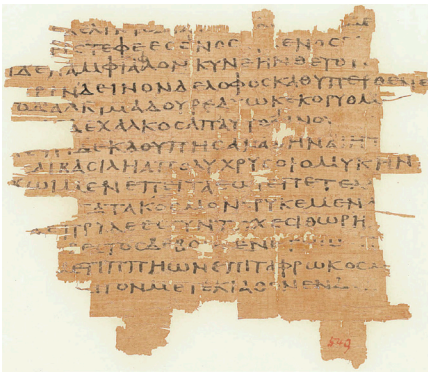

lsv

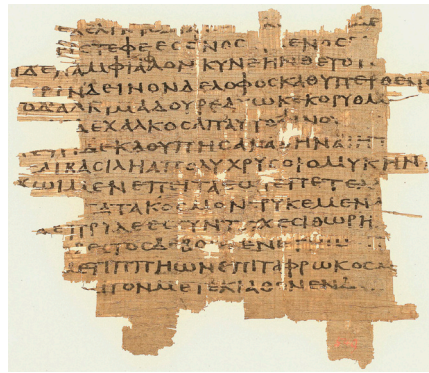

vividness

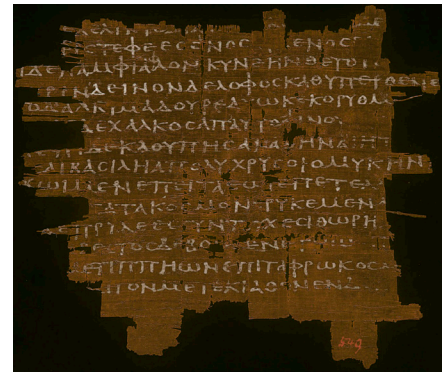

neglsv

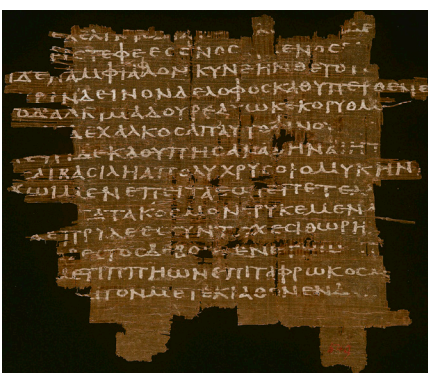

negvividness

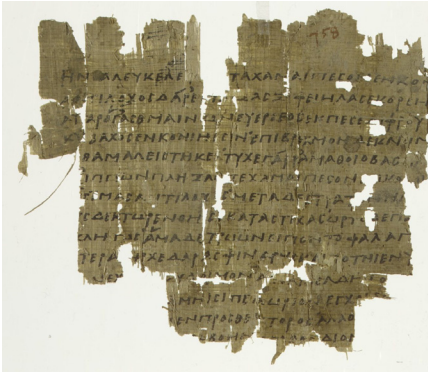

original

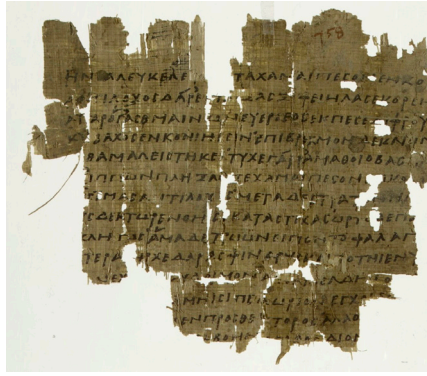

stretchlim

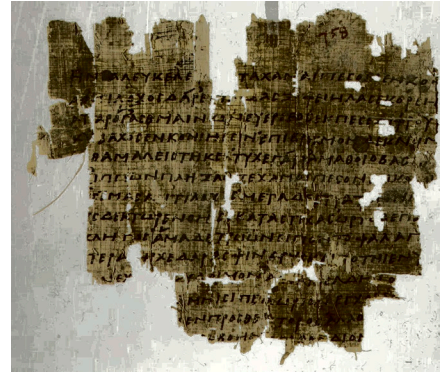

histeq

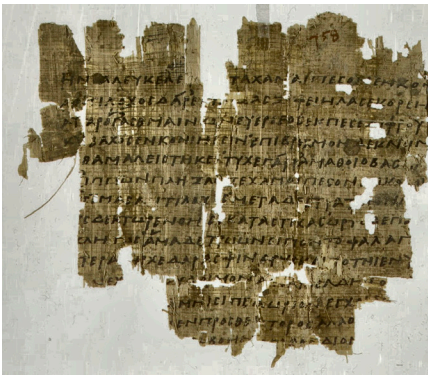

adapthisteq

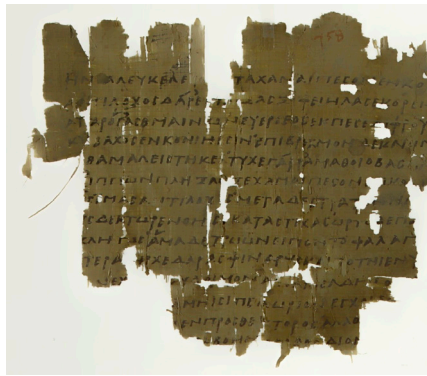

locallapfilt

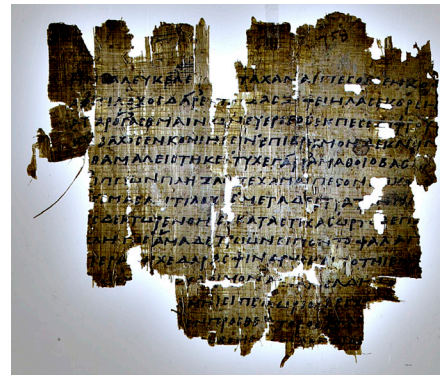

retinex

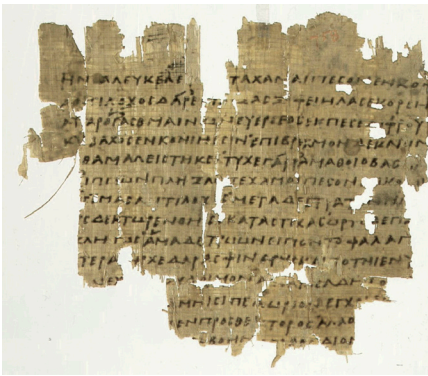

lsv

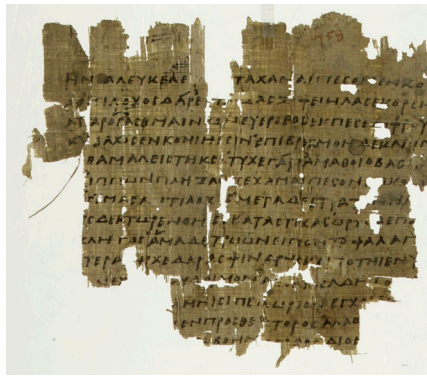

vividness

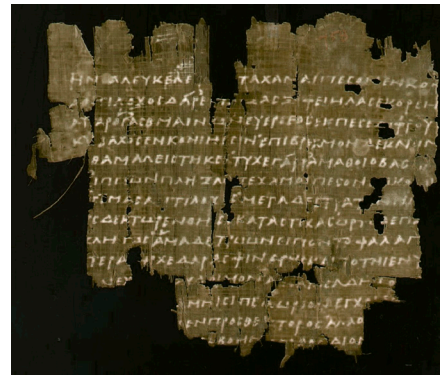

neglsv

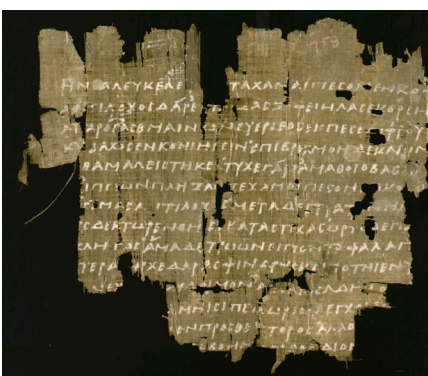

negvividness

P.CtYBR inv. 69

Credit of original papyrus reproduction:  
Yale University Library, Public Domain  
Mark 1.0

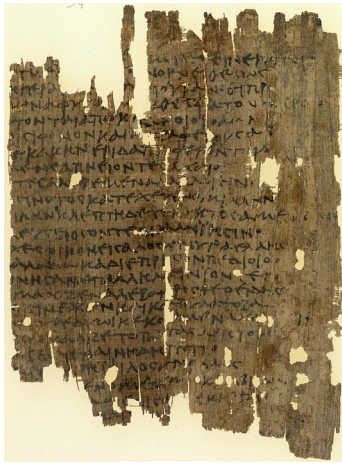

original

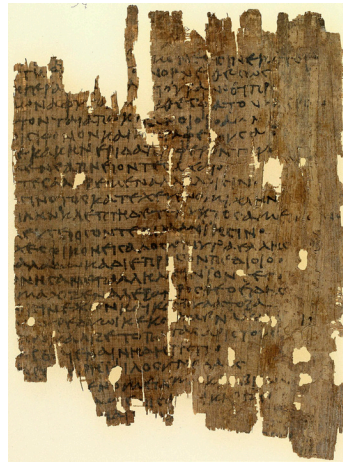

stretchlim

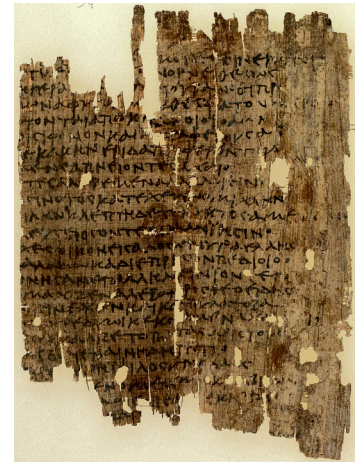

histeq

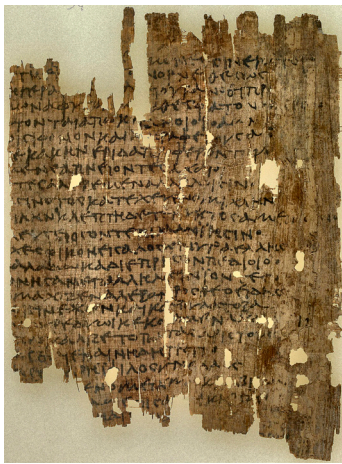

adapthisteq

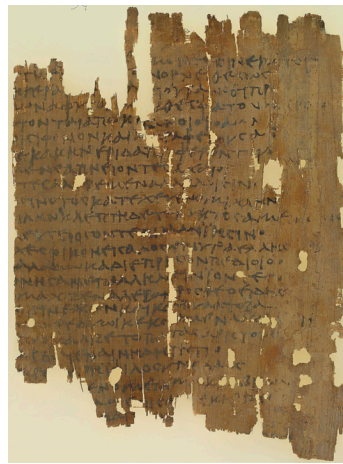

locallapfilt

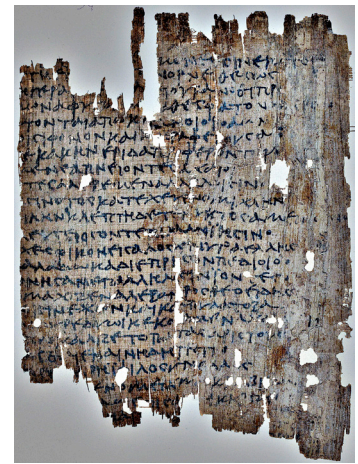

retinex

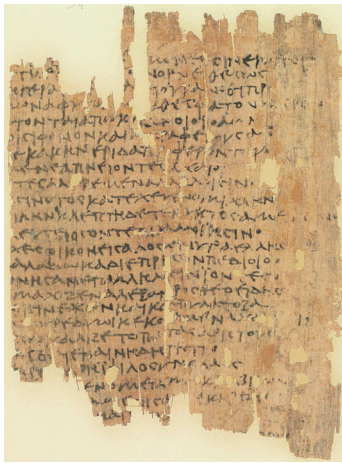

lsv

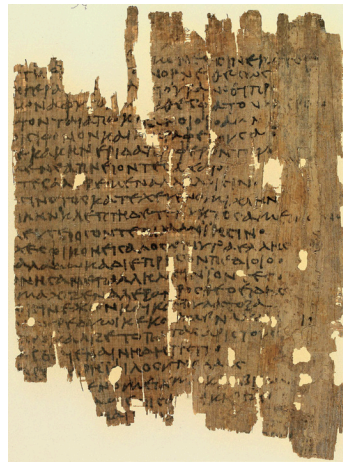

vividness

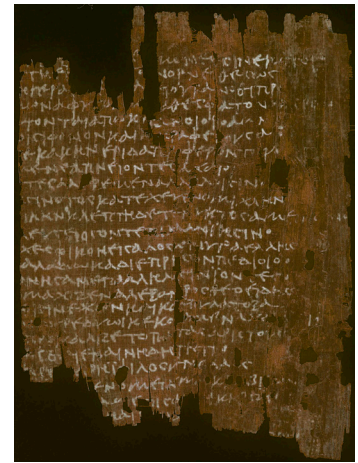

neglsv

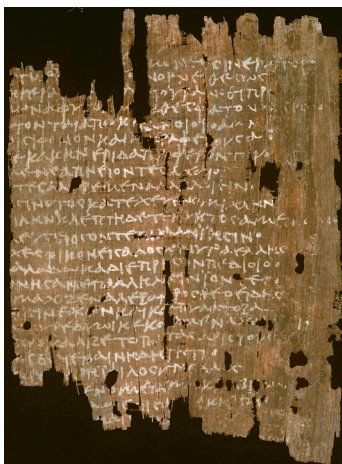

negvividness

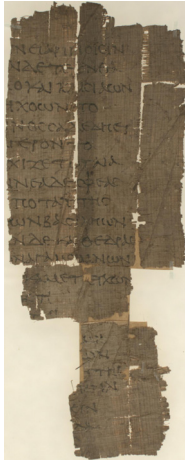

original

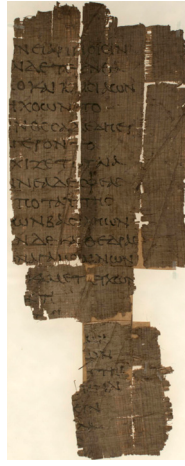

stretchlim

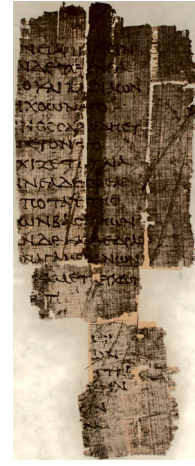

histeq

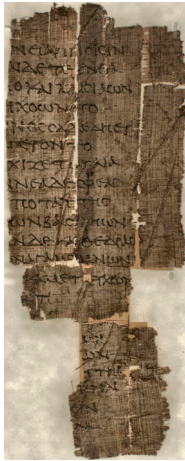

adapthisteq

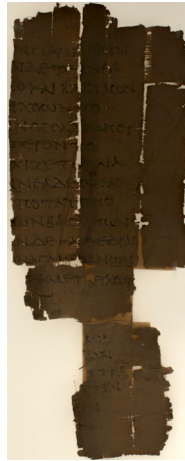

locallapfilt

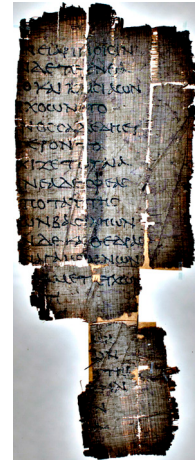

retinex

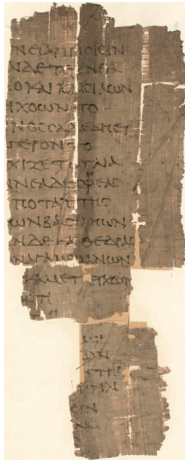

lsv

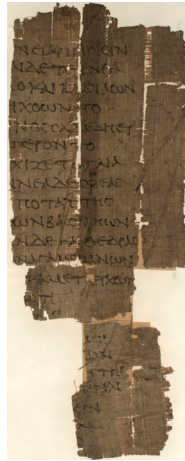

vividness

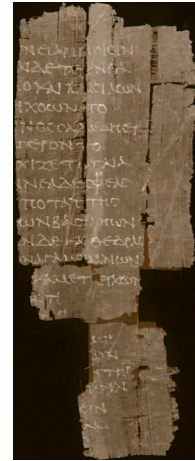

neglsv

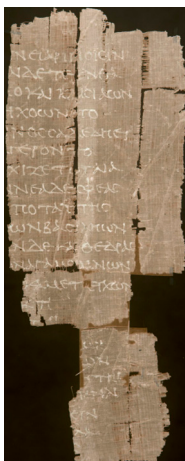

negvividness

**P.Mich.inv.2755**

Credit of original papyrus reproduction:  
University of Michigan Library, Public  
Domain Mark 1.0

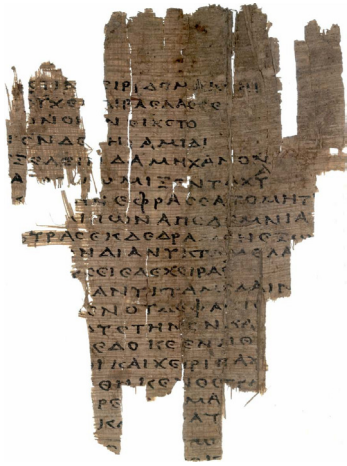

original

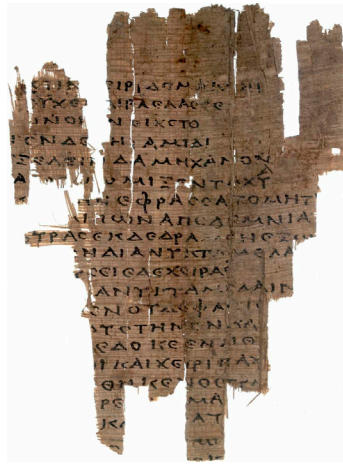

stretchlim

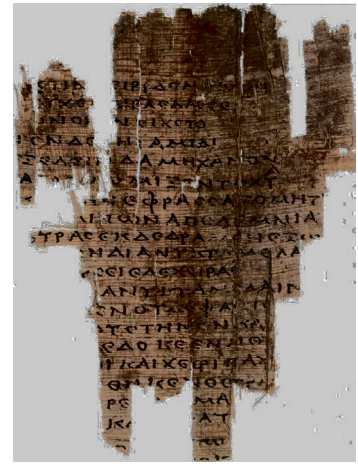

histeq

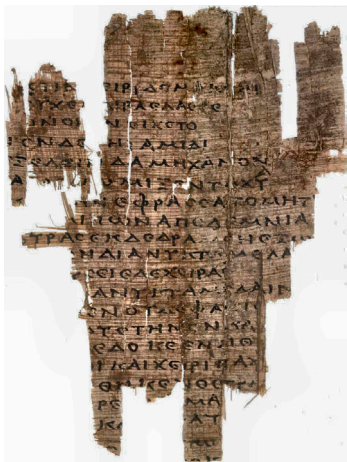

adapthisteq

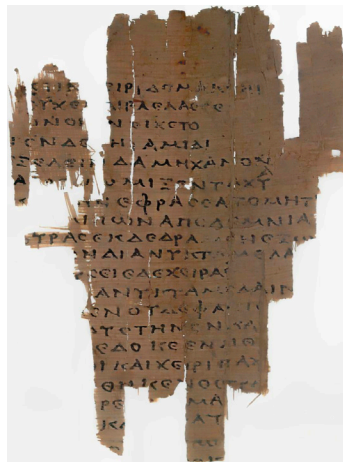

locallapflt

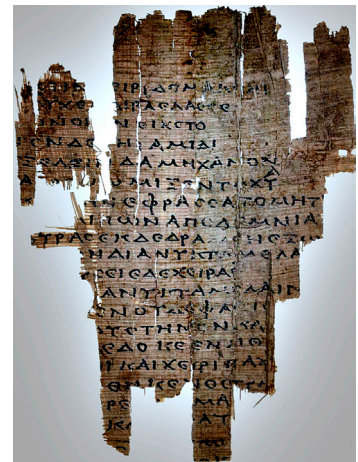

retinex

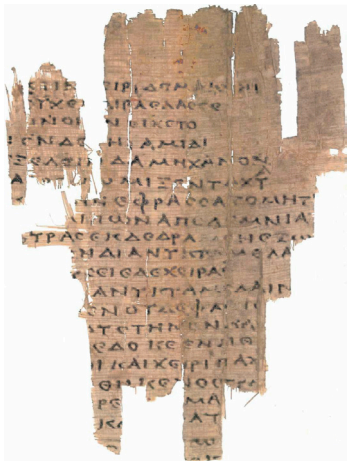

lsv

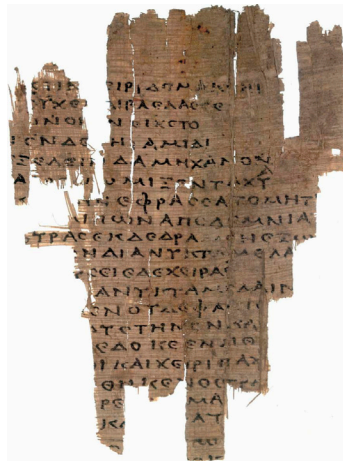

vividness

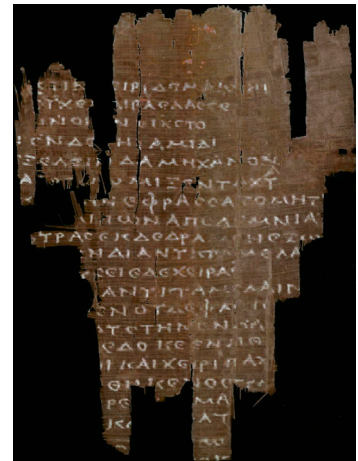

neglsv

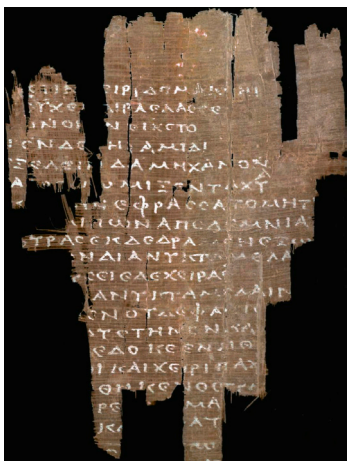

negvividness

**P.Oxy.XXII 2309**

Credit of original papyrus reproduction:  
Courtesy of The Egypt Exploration Society and the University of Oxford Imaging Papyri Project

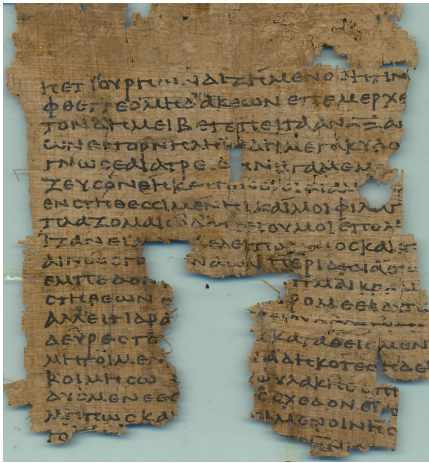

original

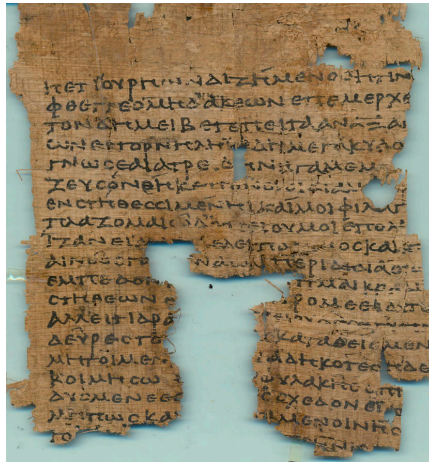

stretchlim

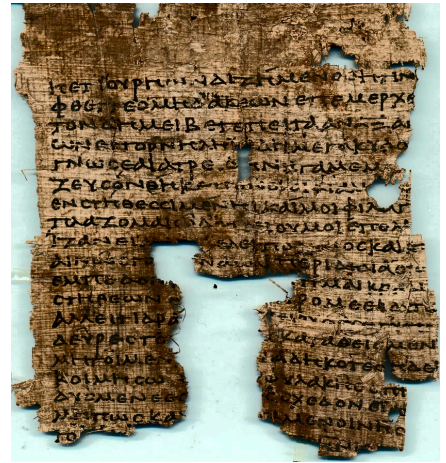

histeq

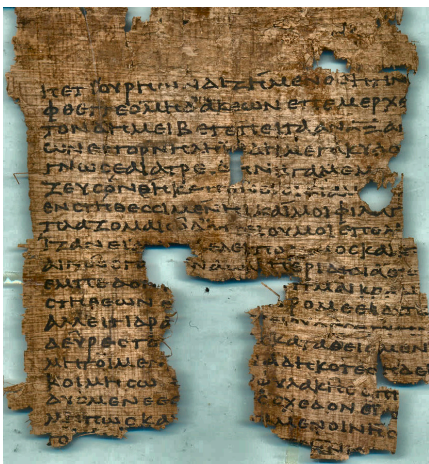

adapthisteq

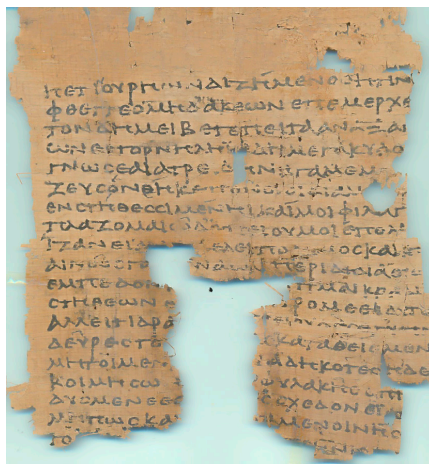

locallapfilt

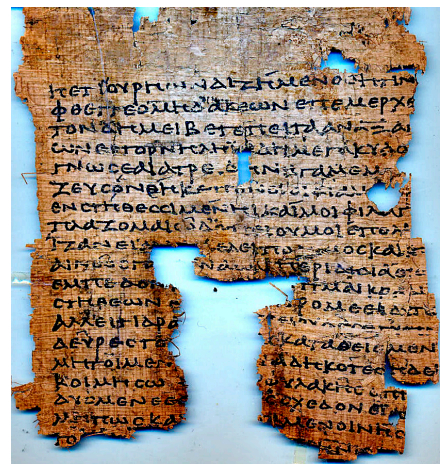

retinex

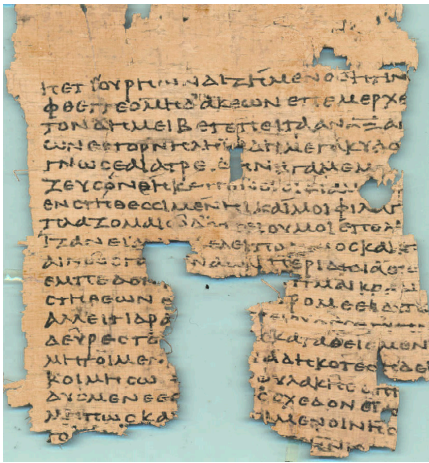

lsv

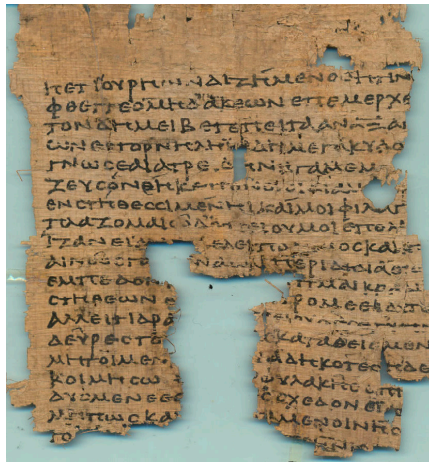

vividness

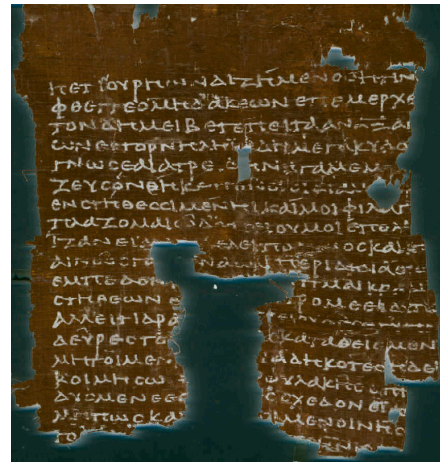

neglsv

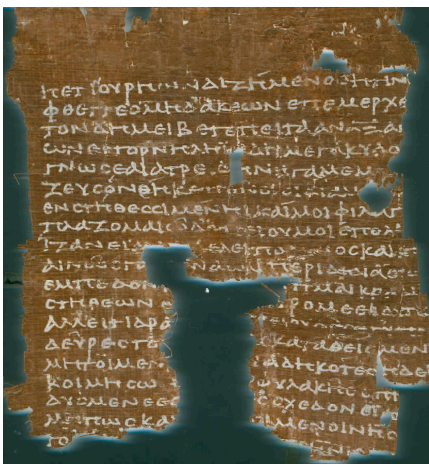

negvividness

### PSIX 1274 r

Credit of original papyrus reproduction: Istituto Papirologico Vitelli, by permission



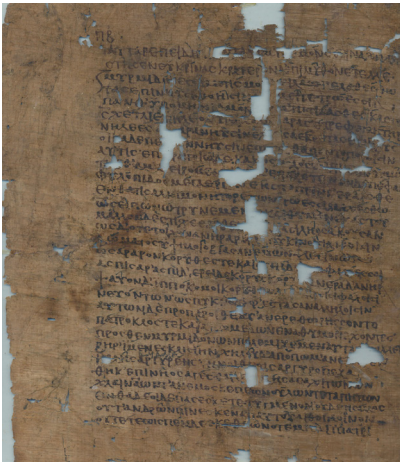

original

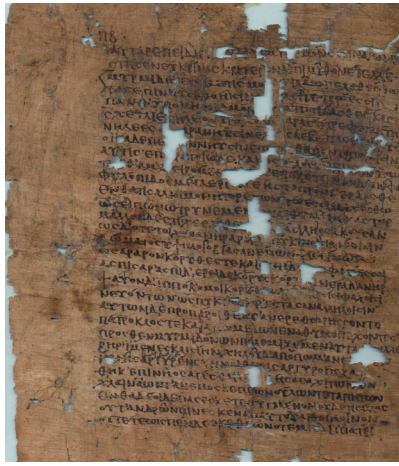

stretchlim

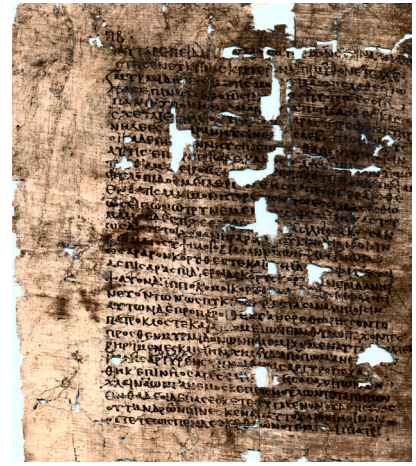

histeq

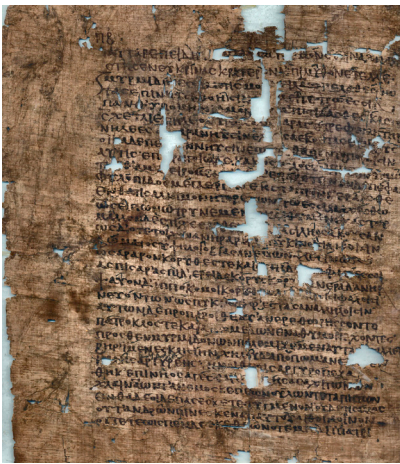

adaphthesteq

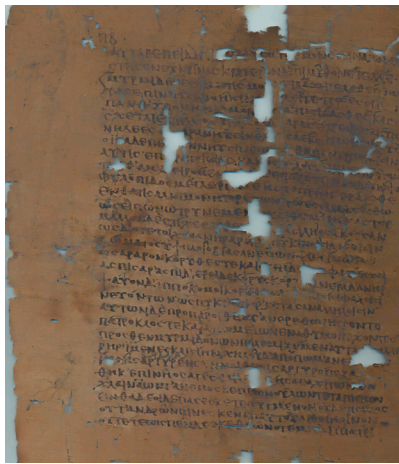

locallapfilt

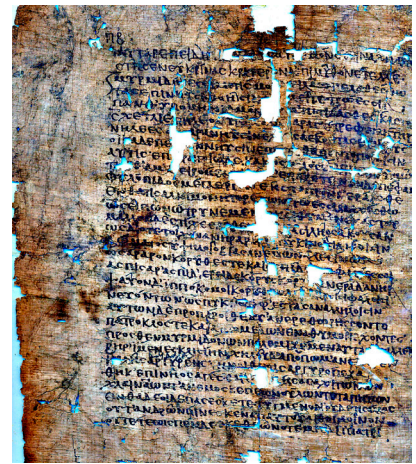

retinex

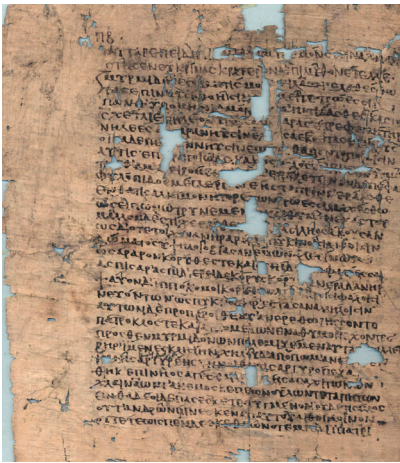

lsv

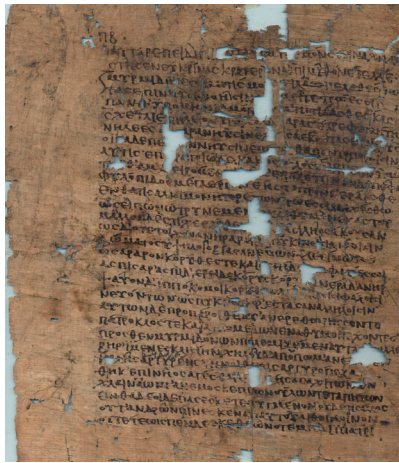

vividness

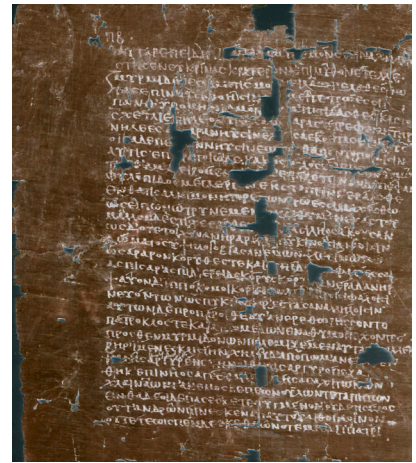

neglsv

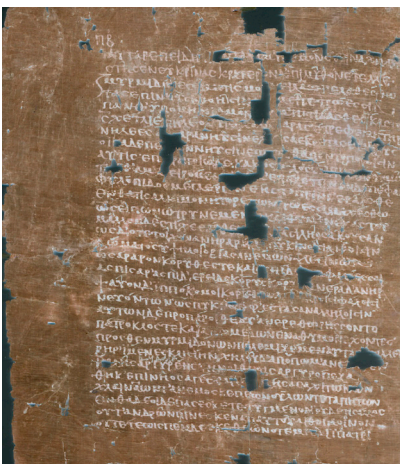

negvividness

### PSI XIII 1298 (15a) r 1

Credit of original papyrus reproduction: Istituto Papirologico Vitelli, by permission

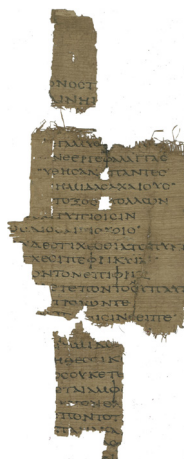

original

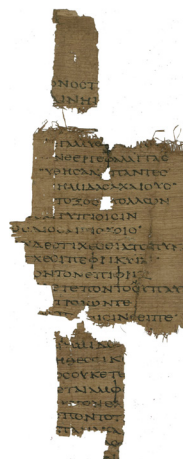

stretchlim

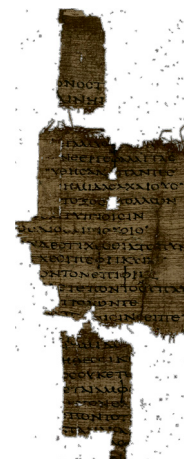

histeq

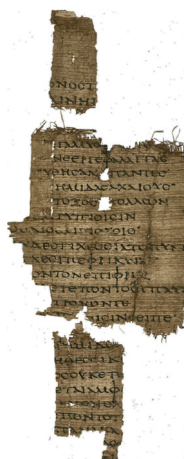

adapthisteq

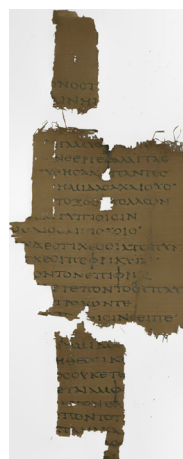

locallapfilt

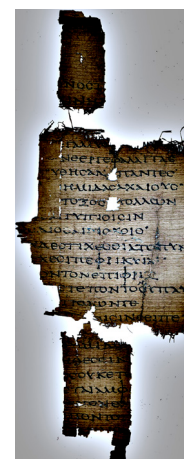

retinex

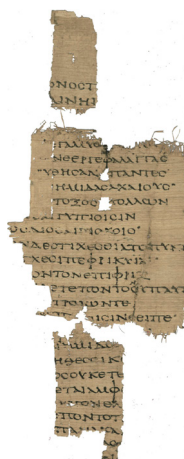

lsv

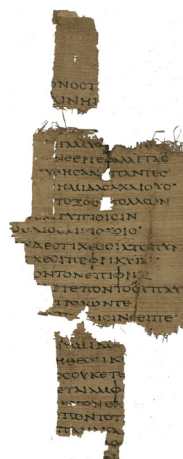

vividness

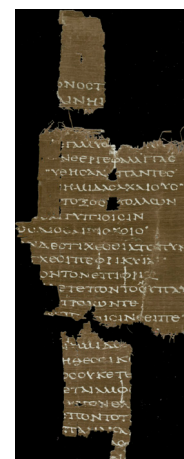

neglsv

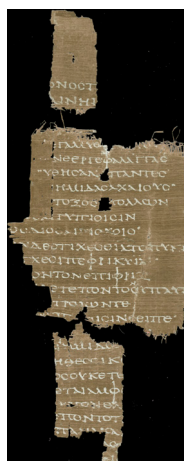

negvividness

**PSIX 1376 r**

Credit of original papyrus reproduction: Istituto Papirologico Vitelli, by permission
